# Supplementary material for: How Is Intelligence Test Performance Associated with Creative Achievement? A Meta-Analysis
Source: MDPI journal article supplement (doi:10.3390/jintelligence9020028), 2021-05-21
Supplement: s1 [file s1]

**Table S1.** The leave-one-out meta-analysis results.

| Study | estimate | se   | 95% CI<br>LB | 95% CI<br>UB | pval | Q      | Qp   | tau2 | I2    | H2   |
|-------|----------|------|--------------|--------------|------|--------|------|------|-------|------|
| 1     | 0,16     | 0,02 | 0,13         | 0,19         | 0,00 | 119,91 | 0,00 | 0,00 | 72,12 | 3,59 |
| 2     | 0,16     | 0,02 | 0,13         | 0,19         | 0,00 | 118,93 | 0,00 | 0,00 | 71,24 | 3,48 |
| 3     | 0,16     | 0,02 | 0,13         | 0,19         | 0,00 | 117,03 | 0,00 | 0,00 | 69,57 | 3,29 |
| 4     | 0,16     | 0,02 | 0,13         | 0,19         | 0,00 | 119,84 | 0,00 | 0,00 | 72,09 | 3,58 |
| 5     | 0,16     | 0,02 | 0,13         | 0,20         | 0,00 | 117,49 | 0,00 | 0,00 | 71,84 | 3,55 |
| 6     | 0,16     | 0,02 | 0,13         | 0,19         | 0,00 | 120,00 | 0,00 | 0,00 | 72,15 | 3,59 |
| 7     | 0,16     | 0,02 | 0,13         | 0,19         | 0,00 | 120,06 | 0,00 | 0,00 | 72,10 | 3,58 |
| 8     | 0,16     | 0,02 | 0,13         | 0,20         | 0,00 | 118,10 | 0,00 | 0,00 | 71,60 | 3,52 |
| 9     | 0,16     | 0,02 | 0,13         | 0,19         | 0,00 | 117,96 | 0,00 | 0,00 | 70,51 | 3,39 |
| 10    | 0,17     | 0,02 | 0,14         | 0,20         | 0,00 | 108,62 | 0,00 | 0,00 | 66,76 | 3,01 |
| 11    | 0,16     | 0,02 | 0,13         | 0,20         | 0,00 | 117,82 | 0,00 | 0,00 | 71,91 | 3,56 |
| 12    | 0,16     | 0,02 | 0,13         | 0,19         | 0,00 | 120,00 | 0,00 | 0,00 | 72,28 | 3,61 |
| 13    | 0,16     | 0,02 | 0,13         | 0,19         | 0,00 | 119,88 | 0,00 | 0,00 | 72,56 | 3,64 |
| 14    | 0,16     | 0,02 | 0,13         | 0,20         | 0,00 | 117,82 | 0,00 | 0,00 | 71,47 | 3,51 |
| 15    | 0,16     | 0,02 | 0,13         | 0,19         | 0,00 | 118,52 | 0,00 | 0,00 | 71,27 | 3,48 |
| 16    | 0,16     | 0,02 | 0,13         | 0,19         | 0,00 | 119,85 | 0,00 | 0,00 | 72,10 | 3,58 |
| 17    | 0,16     | 0,02 | 0,13         | 0,19         | 0,00 | 120,25 | 0,00 | 0,00 | 72,18 | 3,59 |
| 18    | 0,16     | 0,02 | 0,13         | 0,20         | 0,00 | 118,43 | 0,00 | 0,00 | 71,66 | 3,53 |
| 19    | 0,17     | 0,02 | 0,14         | 0,20         | 0,00 | 101,45 | 0,00 | 0,00 | 67,26 | 3,05 |
| 20    | 0,16     | 0,02 | 0,13         | 0,19         | 0,00 | 120,21 | 0,00 | 0,00 | 72,08 | 3,58 |
| 21    | 0,16     | 0,02 | 0,13         | 0,19         | 0,00 | 119,87 | 0,00 | 0,00 | 72,57 | 3,65 |
| 22    | 0,16     | 0,02 | 0,12         | 0,19         | 0,00 | 61,13  | 0,00 | 0,00 | 59,40 | 2,46 |
| 23    | 0,16     | 0,02 | 0,13         | 0,20         | 0,00 | 117,66 | 0,00 | 0,00 | 71,65 | 3,53 |
| 24    | 0,17     | 0,02 | 0,13         | 0,20         | 0,00 | 114,61 | 0,00 | 0,00 | 69,87 | 3,32 |
| 25    | 0,16     | 0,02 | 0,13         | 0,19         | 0,00 | 120,25 | 0,00 | 0,00 | 72,61 | 3,65 |
| 26    | 0,16     | 0,02 | 0,13         | 0,19         | 0,00 | 114,86 | 0,00 | 0,00 | 68,00 | 3,13 |
| 27    | 0,17     | 0,02 | 0,13         | 0,20         | 0,00 | 115,17 | 0,00 | 0,00 | 70,18 | 3,35 |
| 28    | 0,16     | 0,02 | 0,13         | 0,20         | 0,00 | 100,67 | 0,00 | 0,00 | 67,63 | 3,09 |
| 29    | 0,16     | 0,02 | 0,13         | 0,19         | 0,00 | 119,94 | 0,00 | 0,00 | 72,76 | 3,67 |
| 30    | 0,16     | 0,02 | 0,13         | 0,19         | 0,00 | 120,24 | 0,00 | 0,00 | 72,49 | 3,63 |
| 31    | 0,16     | 0,02 | 0,13         | 0,19         | 0,00 | 120,25 | 0,00 | 0,00 | 72,68 | 3,66 |
